# Supplementary material for: Inferring Biochemical Reactions and Metabolite Structures to Understand Metabolic Pathway Drift
Source: PubMed Central journal article supplement — iScience. 2020 Jan 17;23(2):100849. doi: 10.1016/j.isci.2020.100849 (PMC6997860; doi:10.1016/j.isci.2020.100849), 2020-01-17
Supplement: mmc1.pdf [file mmc1.pdf]

iScience, Volume 23

## **Supplemental Information**

### **Inferring Biochemical Reactions and Metabolite Structures to Understand Metabolic Pathway Drift**

**Arnaud Belcour, Jean Girard, Méziane Aite, Ludovic Delage, Camille Trottier, Charlotte Marteau, Cédric Leroux, Simon M. Dittami, Pierre Sauleau, Erwan Corre, Jacques Nicolas, Catherine Boyen, Catherine Leblanc, Jonas Collén, Anne Siegel, and Gabriel V. Markov**

## TRANSPARENT METHODS

### Genome-Scale Metabolic Network reconstruction

Genome-Scale Metabolic Network (GSMN) reconstruction was performed using the AuReMe pipeline (Aite et al., 2018). A set of 85 targets coming from the literature was used as an input and is provided in Table S1. Orphan metabolites that are experimentally supported but do not have a MetaCyc ID are listed in Table S2. The process encompassed the following steps:

1) an annotation-based draft network was generated using the PathoLogic program from the Pathway Tools suite, using the gbk file from the *Chondrus crispus* genome annotation (Coll  n et al., 2013) and the metabolic reaction database MetaCyc20.5 (Caspi et al., 2016).

2) an orthology-based network was generated using the protein sequences and metabolic network of *Arabidopsis thaliana* (AraGEM, De Oliveira d'al Molin et al., 2010), using the Pantograph software (Loira et al., 2015) to combine the output of ortholog searches with the Inparanoid and OrthoMCL softwares.

3) an orthology-based network was generated using the protein sequences from the well-annotated red microalga *Galdieria sulphuraria* (Sch  nknecht et al., 2013) and its metabolic network reconstructed using Pathway Tools. This *G. sulphuraria* annotation-based network was then used as a template to generate a *C. crispus* network using Pantograph. We decided to build this template GSMN after realizing that the genbank file was especially annotation-rich.

4) an orthology-based network was also generated using the protein sequences from the version 2 of the annotated genome of *Ectocarpus siliculosus* (Cormier et al., 2017), as well as version 2 of its metabolic network (Aite et al., 2018).

5) the four preliminary networks were merged together in the AuReMe environment, and an additional gap-filling step was performed using Meneco (Prigent et al., 2017), constraining the network to produce the 85 metabolites from the literature that were indexed in the Metacyc database (Table S1).

### Sampling of algae

For sterol analyses, samples from *C. crispus* were collected from a population on the shore at Roscoff, France, in front of the Station Biologique (48  43'38'' N ; 3  59'04'' W). Algal cultures were maintained in 10 L flasks in a culture room at 14  C using filtered seawater and aerated with 0.22   m-filtered compressed air to avoid CO<sub>2</sub> depletion. Photosynthetically active radiation (PAR) was provided by Philips daylight fluorescence tubes at a photon flux density of 40   mol.m<sup>-2</sup>.s<sup>-1</sup> for 10 h.d<sup>-1</sup>. The algal samples were freeze dried, ground to powder using a cryogrinder and stored at

-80°C.

For MAAs analysis, more than 50 g (wet weight) of *C. crispus* were collected along the Brittany coasts (France) at Ploemeur (47°42'07'' N; 3°24'31'' W) in July 2013, Roscoff (48°43'38'' N; 3°59'04'' W) in April and August 2013, and Tregunc (47°50'25''N; 3°54'08'' W) in September 2013.

### **Standards and reagents**

Cholesterol, stigmasterol,  $\beta$ -sitosterol, 7-dehydrocholesterol, lathosterol ( $5\alpha$ -cholest-7-en-3 $\beta$ -ol), squalene, campesterol, brassicasterol, desmosterol, lanosterol, fucosterol, cycloartenol,  $5\alpha$ -cholestane (internal standard) were acquired from Sigma-Aldrich (Saint-Quentin-Fallavier, France), cycloartanol and cycloeucalenol from Chemfaces (Wuhan, China) and zymosterol from Avanti Polar Lipids (Alabaster, USA). The C7-C40 Saturated Alkanes Standards were acquired from Supelco (Bellefonte, USA). Reagents used for extraction, saponification, and derivation steps were *n*-hexane, ethyl acetate, acetonitrile, methanol (Carlo ERBA Reagents, Val de Reuil, France), (trimethylsilyl)diazomethane, toluene (Sigma-Aldrich, Saint-Quentin-Fallavier, France) and N,O-bis(trimethylsilyl)trifluoroacetamide with trimethylchlorosilane (BSTFA:TMCS (99:1)) (Supelco, Bellefonte, USA).

### **Standard preparation**

Stock solutions of cholesterol, stigmasterol,  $\beta$ -sitosterol, 7-dehydrocholesterol, lathosterol ( $5\alpha$ -cholest-7-en-3 $\beta$ -ol), squalene, campesterol, brassicasterol, desmosterol, lanosterol, fucosterol, cycloartenol and  $5\alpha$ -cholestane were prepared in hexane with a concentration of 5 mg.mL<sup>-1</sup>. Working solutions were made at a concentration of 1 mg.mL<sup>-1</sup>, in hexane, by diluting stock solutions. The C7-C40 Saturated Alkanes Standard stock had a concentration of 1 mg.mL<sup>-1</sup> and a working solution was made at a concentration of 0.1 mg.mL<sup>-1</sup>. All solutions were stored at -20°C.

### **Sample preparation**

For sterol analyses, dried algal samples (60 mg) were extracted with 2mL ethyl acetate by continuous agitation for 1 hour at 4°C. After 10 min of centrifugation at 4000 rpm, the solvent was removed, the extracts were saponified in 3 mL of methanolic potassium hydroxide solution (1M) by 1 hour incubation at 90°C. The saponification reaction was stopped by plunging samples into an ice bath for 30 min minimum. The unsaponifiable fraction was extracted with 2 mL of hexane and 1.2 mL of water and centrifuged at 2000 rpm for 5 min. The upper phase was collected, dried under N<sub>2</sub>, and resuspended with 120  $\mu$ L of (trimethylsilyl)diazomethane, 50  $\mu$ L of methanol:toluene (2:1 (v/v)) and 5  $\mu$ L of  $5\alpha$ -cholestane (1 mg.mL<sup>-1</sup>) as internal standard. The mixture was vortexed for 30

seconds, and heated at 37°C for 30 min. After a second evaporation under N<sub>2</sub>, 50 µL of acetonitrile and 50 µL of BSTFA:TMCS (99:1) were added to the dry residue, vortexed for 30 seconds and heated at 60°C for 30 min. After final evaporation under N<sub>2</sub>, the extract was resuspended in 100 µL of hexane, transferred into a sample vial and stored at -80°C until the GC-MS analysis.

For MAAs, one gram of dried algae was extracted twice for two hours under continuous shaking with 10 mL of acetone. After 5 min of centrifugation at 3000 rpm, acetone was discarded and samples were re-extracted twice with 10 mL water/acetone (30/70, v/v) for 24 hours under continuous shaking at 120 rpm. Water/acetone supernatants were pooled, added to one gram of silica and evaporated to dryness by rotary evaporation. Extracts were then purified by silica gel chromatography column with dichloromethane/methanol mixtures and MAAs were eluted with 200 mL of dichloromethane/methanol (15/85, v/v). After rotary evaporation, samples were re-suspended in water/methanol (50/50, v/v) and filtrated using 0.45 µm syringes filter. Solution were adjusted to a final concentration of 1 mg.mL<sup>-1</sup> and stored at 3°C until LC-MS analysis.

#### **Sterol analysis by gas chromatography-mass spectrometry**

The sterols were analyzed on a 7890 Agilent Technologies gas chromatography coupled with a 5975C Agilent Technologies mass spectrometer (GC-MS). A HP-5MS capillary GC column (30 m x 0.25 mm x 0.25 µm) from J&W Scientific (CA, USA) was used for separation and UHP helium was used as carrier gas at flow rate to 1 mL.min<sup>-1</sup>. The temperature of the injector was 280°C and the detector temperature was 315°C. After injection, the oven temperature was kept at 60°C for 1 min. The temperature was increased from 60°C to 100°C at a rate of 25°C.min<sup>-1</sup>, then to 250°C at a rate of 15°C.min<sup>-1</sup>, then to 315°C at a rate of 3°C.min<sup>-1</sup> and then held at 315°C for 2 min, resulting in a total run time of 37 min. Electronic impact mass spectra were measured at 70eV and an ionization temperature of 250°C. The mass spectra scanned from m/z 50 to m/z 500. Peaks were identified based on the comparisons with the retention times and the mass spectra (Table S3).

#### **MAA analysis by liquid chromatography-mass spectrometry**

High Resolution Mass Spectrometry was carried out on a microTOF-Q II (Bruker Daltonics, Germany) coupled to an Ultimate 3000 LC System (Dionex, Germany). Experiments were performed on a Gemini C6-Phenyl column (250 mm x 4.6 mm x 5 µm) (Phenomenex, Germany). The gradient was as follows: methanol/water (20:80, v/v) with 0.2% acid acetic for two minutes to 100 % methanol with 0.2% acid acetic in 23 minutes. The UV detector was set to 330 nm, flow rate was kept constant at 0.4 mL.min<sup>-1</sup> and column temperature set at 30°C. MS spectra were recorded in positive ESI mode with a drying gas temperature of 220°C, a nitrogen flow of 12 L.min<sup>-1</sup>, a nebulizer pressure set to 60 psi, and a collision energy of 20 eV. MAAs were identified by HR-MS

on the basis of the detection of the pseudo-molecular ion  $[M+H]^+$  with a  $m/z$  value varying less than  $\pm 0.02$  Da compared to the theoretical  $m/z$  value. In the absence of commercially available standards, relative quantification of MAAs in each sample was estimated by calculating the ratio between the area under the curve of the Extracted Ion Chromatogram (EIC) corresponding to the selected MAAs and the sum of the areas under the curve of the EIC of all MAAs detected in the algal extract. The same procedure was applied to UV detection (Table S4).

### **Flux-balance analysis**

A biomass reaction was established based on the previous *E. siliculosus* data, defining a list of 33 compounds to be produced in order to consider the network functional (Prigent et al., 2014). One compound, L-alpha-alanine, was not producible, thus blocking biomass production. This was due to the absence of the alanine dehydrogenase reaction. The corresponding enzyme (CHC\_T00008930001) was present in the *C. crispus* network but annotated as an NAD(P) transhydrogenase. We completed the annotation through the manual curation form to enable it to dehydrogenate alanine and to restore producibility of the biomass ([https://gem-aureme.genouest.org/ccrgem/index.php/Manual-ala\\_dehy](https://gem-aureme.genouest.org/ccrgem/index.php/Manual-ala_dehy)).

### **Global metabolic networks comparisons**

In order to compare the global features of the GSM from *C. crispus* with other ones, it is necessary to use the same reference database. This is the case for *E. siliculosus* and *E. subulatus* for which the reconstructions are based on MetaCyc (Caspi et al., 2016) while *A. thaliana* and *Chlamydomonas reinhardtii* are respectively from KEGG (Kanehisa et al., 2017) and BiGG (King et al., 2016). To get access to MetaCyc pathway information for *A. thaliana* and *C. reinhardtii*, their networks were mapped using the sbml\_mapping function implemented in the AuReMe workflow (Aite et al., 2018). This function provides a dictionary of corresponding reactions from a database to another one using the MetaNetX cross-reference database (Moretti et al., 2016). This dictionary was then used in AuReMe to create a new genome-scale metabolic network based on the new reference database for *A. thaliana* and *C. reinhardtii*. Those new networks, who are comparable in size with the published ones (+/- 10 reactions and enzymes in our counts) enabled to estimate the number of pathways as defined in MetaCyc for both species.

### ***Ab-initio* inference of metabolic reactions: implementation of a Semi-Automatic Analogy Reasoning Approach**

The Pathmodel method was developed to infer new reactions based on molecular similarity and dissimilarity. This knowledge-based approach is founded on two modes of reasoning (deductive and

analogical) and was implemented using a logic programming approach known as Answer Set Programming (ASP) (Lifschitz et al., 2008; Gebser et al., 2012). It is a declarative approach oriented toward combinatorial (optimization) problem-solving and knowledge processing. ASP combines both a high-level modeling language with high performance solving engines so that the focus is on the problem specification rather than the algorithmic part. ASP expresses a problem as a set of logical rules (clauses). Problem solutions appear as particular logical models (so-called stable models or answer sets) of this set. An ASP program consists of rules  $h :- b_1, \dots, b_m \text{ not } b_{m+1}, \dots, \text{not } b_n$ , where each  $b_i$  and  $h$  are literals and *not* stands for default negation. In fact, each proposition is a predicate, encoded by a function whose arguments can be constant atoms or variables over a finite domain. The rule states that the head  $h$  is proven to be true ( $h$  is in an answer set) if the body of the rule is satisfied, i.e.  $b_1, \dots, b_m$  are true and it cannot be proved that  $b_{m+1}, \dots, b_n$  are true.

The main predicates used in Pathmodel to represent molecules and reactions forming a knowledge base are *bond*, *atom* and *reaction*. The theoretical m/z ratio of a molecule is determined by logical rules, which were encoded in the program MZComputation.lp.

As depicted in Figure 3, several logical rules are then applied to all possible reactions and potential reactants. These are the bases for the selection of potential reactants or products and the inference by a reasoning component of reaction occurrences or metabolites, using either deductive or analogical reasoning in the PathModel.lp program. Resulting products that do not belong to the knowledge base but that correspond to an observed m/z ratio are considered as inferred metabolites and reactions. The finally encoded reactions result from iterative interactions between analogical model construction, automated inference, and manual validation of inferred reactions with respect to experimental results.

By comparing reactants and products, the program ReactionSiteExtraction.lp characterizes two structures of the reaction site containing atoms and bonds involved in the reaction. The predicates *diffAtomBeforeReaction*, *diffBondBeforeReaction*, *diffAtomAfterReaction* and *diffBondAfterReaction* compare atoms and bonds between the reactant and the product and extract the two structures. Then these two structures are compared to the structure of all other molecules in the knowledge base (predicates *siteBeforeReaction* and *siteAfterReaction*). These predicates characterize sub-structures of the molecules that can be part of a reaction.

By deductive reasoning, the reference molecule pair of each reaction is compared to the structures of a potential reactant-product pair sharing a common chemical structure. The presence of the reaction site in the two putative molecules is checked using the predicates *siteBeforeReaction* and *siteAfterReaction*. Furthermore, if the product and the reactant have the same overall structure, except for the reaction site, the program will infer that the reaction actually occurs between the

reactant and the product.

By analogical reasoning, all possible reactions are applied to potential reactants, and resulting products are filtered using their structures and m/z ratios. The predicate *newMetaboliteName* creates all the possible products from a known molecule using all the reactions in the knowledge base. These possible metabolites are filtered using their m/z ratios, which must correspond to an unassigned m/z ratio (predicate *possibleMetabolite*) and checked if they share the same structure as a known molecule (predicate *alreadyKnownMolecule*). If they do not fit with an already known molecule, they will be added as new molecules and a new reaction variant.

Given a source molecule and a target molecule, the program will take several inference steps iteratively applying either analogical or deductive reasoning modes. To connect the source and the target molecules along a pathway, Pathmodel infers missing reactions and metabolites using a minimal number of reactions. To further constraint the number of possible pathways, a predicate *absentmolecules* was added to avoid pathways with compounds for which targeted profiling with analytical standards gives strong evidence for real absence (here ergosterol, fucosterol and zymosterol). The source code is available in the following Github repository: <https://github.com/pathmodel/pathmodel>

It includes a specific tutorial to replicate the analysis reported in the article :

<https://github.com/pathmodel/pathmodel#tutorial-on-article-data-chondrus-crispus-sterol-and-mycosporine-like-amino-acids-pathways>

### ***De novo* gene prediction and manual curation of gene sequence models**

Missing genes from the sterol synthesis pathway (squalene monooxygenase and sterol C-4 methyl oxidase) were found by targeted tblastn using orthologs from other organisms as a query. The new gene predictions are provided in supplementary dataset 1 and will be included in the next version of *C. crispus* genome browser (<http://mmo.sb-roscoff.fr/jbrowse/?data=data%2Fpublic%2Fchondrus>). The split protein sequence of sterol delta-7 reductase was also restored as a single protein prediction, merging the two adjacent partial predictions.

### **Phylogenetic analyses**

Collected sequences were aligned using Clustal Omega (Sievers and Higgins, 2014) and alignments were checked manually and edited with Seaview (Gouy et al., 2010). Phylogenetic trees were built using PHYML (Guindon and Gascuel, 2003) using the LG model (Le and Gascuel, 2010) with a gamma law. The reliability of nodes was assessed by likelihood-ratio test (Anisimova and Gascuel, 2006).

## SUPPLEMENTAL REFERENCES

- Anisimova, M., and Gascuel, O. (2006). Approximate likelihood-ratio test for branches: A fast, accurate, and powerful alternative. *Syst. Biol.* *55*, 539 – 552.
- Gouy, M., Guindon, S., and Gascuel, O. (2010). SeaView version 4: A multiplatform graphical user interface for sequence alignment and phylogenetic tree building. *Mol. Biol. Evol.* *27*, 221 – 224.
- Guindon, S., and Gascuel, O. (2003). A simple, fast, and accurate algorithm to estimate large phylogenies by maximum likelihood. *Syst. Biol.* *52*, 696 – 704.
- Kanehisa, M., Furumichi, M., Tanabe, M., Sato, Y., and Morishima, K. (2017). KEGG: new perspectives on genomes, pathways, diseases and drugs. *Nucleic Acids Res.* *45*, D353 – D361.
- King, Z.A., Lu, J., Dräger, A., Miller, P., Federowicz, S., Lerman, J.A., Ebrahim, A., Palsson, B.O., and Lewis, N.E. (2016). BiGG Models: A platform for integrating, standardizing and sharing genome-scale models. *Nucleic Acids Res.* *44*, D515 – D522.
- Le, S.Q., and Gascuel, O. (2010). Accounting for solvent accessibility and secondary structure in protein phylogenetics is clearly beneficial. *Syst. Biol.* *59*, 277 – 287.
- Loira, N., Zhukova, A., and Sherman, D.J. (2015) Pantograph: A template-based method for genome-scale metabolic model reconstruction. *J. Bioinform. Comput. Biol.* *13*, 1550006.
- Moretti, S., Martin, O., Van Du Tran, T., Bridge, A., Morgat, A., and Pagni, M. (2016). MetaNetX/MNXref – reconciliation of metabolites and biochemical reactions to bring together genome-scale metabolic networks. *Nucleic Acids Res.* *44*, D523 – D526.
- Prigent, S., Frioux, C., Dittami, S.M., Thiele, S., Larhlimi, A., Collet, G., Gutknecht, F., Got, J., Eveillard, D., Bourdon, J., et al. (2017). Meneco, a topology-based gap-filling tool applicable to degraded genome-wide metabolic networks. *PLoS Comput. Biol.* *13*, e1005276.
- Sievers, F., and Higgins, D.G. (2014). Clustal Omega, accurate alignment of very large numbers of sequences. *Methods Mol. Biol.* *1079*, 105 – 116.
- Schönknecht, G., Chen, W.H., Ternes, C.M., Barbier, G.G., Shrestha, R.P., Stanke, M., Bräutigam, A., Baker, B.J., Banfield, J.F., Garavito, R.M., et al. (2013). Gene transfer from bacteria and archaea facilitated evolution of an extremophilic eukaryote. *Science* *339*, 1207 – 1210.



Table S1 related to Fig 6. Database metabolites.

| Usual name                                                     | Category             | MetaCyC ID                         | References                                                                                                    |
|----------------------------------------------------------------|----------------------|------------------------------------|---------------------------------------------------------------------------------------------------------------|
| dodecanoic acid                                                | 12:0 fatty acid      | DODECANOATE                        | Santos et al., 2015 ; Robertson et al., 2015                                                                  |
| Myristic acid                                                  | 14:0 fatty acid      | CPD-7836                           | Pettitt et al., 1989; Tasende, 2000; Van Ginneken et al., 2011; Robertson et al., 2015 ; Belghit et al., 2017 |
| Pentadecanoic acid                                             | 15:0 fatty acid      | CPD-8462                           | Santos et al., 2015. Belghit et al., 2017                                                                     |
| Palmitic acid                                                  | 16:0 fatty acid      | PALMITATE                          | Pettitt et al., 1989; Tasende, 2000; Van Ginneken et al., 2011; Robertson et al., 2015 ; Belghit et al., 2017 |
| Heptadecanoic acid                                             | 17:0 fatty acid      | CPD-7830                           | Santos et al., 2015                                                                                           |
| Stearic acid                                                   | 18:0 fatty acid      | STEARIC_ACID                       | Tasende et al., 2000 ; Robertson et al., 2015                                                                 |
| Eicosanoic acid                                                | 20:0 fatty acid      | ARACHIDIC_ACID                     | Santos et al., 2015                                                                                           |
| Docosanoic acid                                                | 22:0 fatty acid      | DOCOSANOATE*                       | Santos et al., 2015                                                                                           |
| Tricosanoic acid                                               | 23:0 fatty acid      | CPD-7834*                          | Santos et al., 2015                                                                                           |
| Tetracosanoic acid                                             | 24:0 fatty acid      | TETRACOSANOATE                     | Santos et al., 2015                                                                                           |
| Palmitoleic acid                                               | 16:1(n-7) fatty acid | CPD-9245                           | Pettitt et al., 1989; Tasende, 2000; Robertson et al., 2015 ; Belghit et al., 2017                            |
| Oleic acid                                                     | 18:1(n-9) fatty acid | OLEATE-CPD                         | Tasende et al., 2000; Van Ginneken et al., 2011; Robertson et al., 2015 ; Belghit et al., 2017                |
| Linoleic acid                                                  | 18:2(n-6) fatty acid | LINOLEIC_ACID                      | Tasende et al., 2000 ; Robertson et al., 2015 ; Belghit et al., 2017                                          |
| Alpha Linolenic acid                                           | 18:3(n-3) fatty acid | LINOLENIC_ACID*                    | Tasende et al., 2000                                                                                          |
| γ-linolenic acid                                               | 18:3(n-6) fatty acid | CPD-8117*                          | Robertson et al., 2015 ; Belghit et al., 2017                                                                 |
| Octadecatetraenoic acid                                        | 18:4(n-3) fatty acid | CPD-12653*                         | Tasende et al., 2000 ; Robertson et al., 2015 ; Belghit et al., 2017                                          |
| Arachidonic acid                                               | 20:4(n-6) fatty acid | ARACHIDONIC_ACID                   | Tasende et al., 2000 ; Banskota et al., 2014 ; Robertson et al., 2015 ; Belghit et al., 2017                  |
| Eicosapentaenoic acid                                          | 20:5(n-3) fatty acid | 5Z8Z11Z14Z17Z-EICOSAPENTAENOATE*   | Tasende et al., 2000 ; Banskota et al., 2014 ; Robertson et al., 2015 ; Belghit et al., 2017                  |
| Octanedioic acid                                               | fatty acid           | CPD0-1264*                         | Santos et al., 2015                                                                                           |
| Nonanedioic acid                                               | fatty acid           | CPD0-1265*                         | Santos et al., 2015                                                                                           |
| Cycloartenol                                                   | sterol               | CYCLOARTENOL*                      | Saito and Idler, 1966; Alcaide et al., 1968                                                                   |
| Cholesterol                                                    | sterol               | CHOLESTEROL*                       | Saito and Idler, 1966; Tasende et al., 2000 ; Santos et al., 2015                                             |
| 7-Dehydrocholesterol                                           | sterol               | 7-DEHYDROCHOLESTEROL*              | Tasende et al., 2000                                                                                          |
| Brassicasterol                                                 | sterol               | BRASSICASTEROL*                    | Saito and Idler, 1966 ; Tasende et al., 2000                                                                  |
| Campesterol                                                    | sterol               | CAMPESTEROL*                       | Tasende et al., 2000 ; Santos et al., 2015                                                                    |
| 24-Methylenecholesterol                                        | sterol               | 24-METHYLENECHOLESTEROL*           | Tasende et al., 2000                                                                                          |
| Sitosterol                                                     | sterol               | SITOSTEROL*                        | Saito and Idler, 1966; Tasende et al., 2000 ; Santos et al., 2015                                             |
| Stigmasterol                                                   | sterol               | STIGMASTEROL*                      | Tasende et al., 2000                                                                                          |
| 15-keto-prostaglandin E2                                       | oxylipin             | HYDROXY-915-DIOXOPROSTA-13-ENOATE* | Gaquerel et al., 2007                                                                                         |
| lutein                                                         | carotenoid           | LUTEIN*                            | Banskota et al., 2014                                                                                         |
| Chlorophyll a                                                  | tetrapyrrole         | CHLOROPHYLL-A                      | Melo et al., 2015 ; Robertson et al., 2015                                                                    |
| all-trans-beta-carotene                                        | carotenoid           | CPD1F-129                          | Robertson et al., 2015                                                                                        |
| 9-cis-beta-carotene                                            | carotenoid           | CPD-14646                          | Robertson et al., 2015 ; Belghit et al., 2017                                                                 |
| zeaxanthin                                                     | carotenoid           | CPD1F-130                          | Robertson et al., 2015                                                                                        |
| 2,6,6-trimethyl-1,3-cyclohexadiene-1-carboxaldehyde (safranal) | carotenoid           | CPD-8669*                          | Pina et al., 2014                                                                                             |
| Alanine                                                        | aminoacid            | L-ALPHA-ALANINE                    | Young et al., 1958, Belghit et al., 2017                                                                      |
| Arginine                                                       | aminoacid            | ARG                                | Young et al., 1958, Belghit et al., 2017                                                                      |
| Aspartic acid                                                  | aminoacid            | L-ASPARTATE                        | Young et al., 1958, Belghit et al., 2017                                                                      |
| Citrulline                                                     | aminoacid            | L-CITRULLINE                       | Young et al., 1958 ; Belghit et al., 2017                                                                     |

Table S1 related to Fig 6. Database metabolites.

|                                   |                               |                                  |                                           |
|-----------------------------------|-------------------------------|----------------------------------|-------------------------------------------|
| Cystine                           | aminoacid                     | CYSTINE                          | Young et al., 1958                        |
| Glutamic acid                     | aminoacid                     | GLT                              | Young et al., 1958 ; Belghit et al., 2017 |
| Glycine                           | aminoacid                     | GLY                              | Young et al., 1958 ; Belghit et al., 2017 |
| Histidine                         | aminoacid                     | HIS                              | Young et al., 1958 ; Belghit et al., 2017 |
| Isoleucine                        | aminoacid                     | ILE                              | Young et al., 1958 ; Belghit et al., 2017 |
| Leucine                           | aminoacid                     | LEU                              | Young et al., 1958 ; Belghit et al., 2017 |
| Lysine                            | aminoacid                     | LYS                              | Young et al., 1958 ; Belghit et al., 2017 |
| Methionine                        | aminoacid                     | MET                              | Young et al., 1958 ; Belghit et al., 2017 |
| Ornithine                         | aminoacid                     | L-ORNITHINE                      | Young et al., 1958 ; Belghit et al., 2017 |
| Phenylalanine                     | aminoacid                     | PHE                              | Young et al., 1958                        |
| Proline                           | aminoacid                     | PRO                              | Young et al., 1958 ; Belghit et al., 2017 |
| Serine                            | aminoacid                     | SER                              | Young et al., 1958 ; Belghit et al., 2017 |
| Threonine                         | aminoacid                     | THR                              | Young et al., 1958 ; Belghit et al., 2017 |
| Tyrosine                          | aminoacid                     | TYR                              | Young et al., 1958 ; Belghit et al., 2017 |
| Valine                            | aminoacid                     | VAL                              | Young et al., 1958 ; Belghit et al., 2017 |
| Shinorine                         | Mycosporine-like aminoacid    | CPD-18778                        | Kräbs et al., 2004                        |
| UDP- $\alpha$ -D-galactose        | nucleotide sugar              | CPD-14553                        | Collén et al., 2014                       |
| D-galactosyl-1,2-diacylglycerol   | galactolipid                  | D-Galactosyl-12-diacyl-glycerols | Banskota et al., 2014                     |
| i-carrageenose                    | carrageenan                   | Iota-Carrageenan*                | Matsuhiro et al., 1992                    |
| v-carrageenan                     | carrageenan                   | Nu-Carrageenan*                  | Matsuhiro et al., 1992                    |
| Glycerol                          | polyol                        | GLYCEROL                         | Santos et al., 2015                       |
| Heptadecane                       | alcane                        | HEPTADECANE-CPD                  | Santos et al., 2015                       |
| 6,10,14-Trimethyl-2-pentadecanone | methylketone                  | CPD-7875                         | Santos et al., 2015                       |
| Hexadecan-1-ol                    | Long chain aliphatic alcohol  | CPD-348                          | Santos et al., 2015                       |
| 9-Octadecen-1-ol                  | Long chain aliphatic alcohol  | CPD-7873                         | Santos et al., 2015                       |
| Docosan-1-ol                      | Long chain aliphatic alcohol  | CPD-7845                         | Santos et al., 2015                       |
| Octacosan-1-ol                    | Long chain aliphatic alcohol  | CPD-7872*                        | Santos et al., 2015                       |
| acetaldehyde                      | aldehyde                      | ACETALD                          | Pina et al., 2014                         |
| 2-methylpropanal                  | aldehyde                      | BUTANAL                          | Pina et al., 2014                         |
| Butanal                           | aldehyde                      | CPD-7031                         | Pina et al., 2014                         |
| 3-methylbutanal                   | aldehyde                      | METHYLBUT-CPD                    | Pina et al., 2014                         |
| Pentanal                          | aldehyde                      | CPD-9053*                        | Pina et al., 2014                         |
| Hexanal                           | aldehyde                      | HEXANAL                          | Pina et al., 2014                         |
| Benzaldehyde                      | aldehyde                      | BENZALDEHYDE                     | Pina et al., 2014                         |
| Ethanol                           | short chain aliphatic alcohol | ETOH                             | Pina et al., 2014                         |
| 1-butanol                         | short chain aliphatic alcohol | BUTANOL                          | Pina et al., 2014                         |
| 1-pentanol                        | short chain aliphatic alcohol | PENTANOL*                        | Pina et al., 2014                         |
| 2-butanone                        | short chain ketone            | ACETONE                          | Pina et al., 2014                         |
| 3,5-octadien-2-one                | short chain ketone            | MEK                              | Pina et al., 2014                         |

Table S1 related to Fig 6. Database metabolites.

|                        |                 |             |                      |
|------------------------|-----------------|-------------|----------------------|
| dichloromethane        | halocarbon      | CPD-681     | Pina et al., 2014    |
| chloroform             | halocarbon      | CPD-843*    | Pina et al., 2014    |
| glycerate              | carboxylic acid | GLYCERATE   | Belghit et al., 2017 |
| 2-methylpropanoic acid | carboxylic acid | ACET        | Pina et al., 2014    |
| 2-methylbutanoic acid  | carboxylic acid | ISOBUTYRATE | Pina et al., 2014    |
| hexane                 | alcane          | CPD-9288*   | Pina et al., 2014    |
| 2,2,4-trimethylpentane | alcane          | CPD-19039*  | Pina et al., 2014    |

\* non predicted in initial GSMN reconstruction

Table S2 related to Fig 6. Orphan metabolites.

| Usual name                                                                                          | Category                   | References                                      |
|-----------------------------------------------------------------------------------------------------|----------------------------|-------------------------------------------------|
| Heneicosanoic acid                                                                                  | 21:0 fatty acid            | Santos et al., 2015                             |
| N/A                                                                                                 | 15:1 fatty acid            | Robertson et al., 2015                          |
| N/A                                                                                                 | 18:1(n-7) fatty acid       | Robertson et al., 2015                          |
| 10-nonadecenoate                                                                                    | 19:1(n-9) fatty acid       | Belghit et al., 2017                            |
| Eicosadienoic acid                                                                                  | 20:2(n-6) fatty acid       | Robertson et al., 2015                          |
| Eicosatrienoic acid                                                                                 | 20:3(n-6) fatty acid       | Robertson et al., 2015                          |
| Docosadienoate                                                                                      | 22:2(n-6) fatty acid       | Belghit et al., 2017                            |
| Octadeca-9-enoic acid                                                                               | fatty acid                 | Santos et al., 2015                             |
| 22-Dehydrocholesterol*                                                                              | sterol                     | Tasende et al., 2000                            |
| 11-hydroxy-octadecadienoic acid (11-HODE)                                                           | oxylipin                   | Gaquereel et al., 2007                          |
| 13-hydroxy-9Z,11E-octadecadienoic acid (13-HODE)                                                    | oxylipin                   | Gaquereel et al., 2007; Belghit et al., 2017    |
| 13S-hydroxy-9Z,11E,15Z-octadecatrienoic acid (13-HOTrE)                                             | oxylipin                   | Belghit et al., 2017                            |
| 13-oxo-9Z,11E-octadecadienoic acid (13-oxo-ODE)                                                     | oxylipin                   | Gaquereel et al., 2007                          |
| 13-hydroxyeicosatrienoic acid (13-HETrE)                                                            | oxylipin                   | Gaquereel et al., 2007                          |
| 13-hydroxyeicosatetraenoic acid (13-HETE)                                                           | oxylipin                   | Gaquereel et al., 2007                          |
| 13-hydroxyeicosapentaenoic acid (13-HEPE)                                                           | oxylipin                   | Gaquereel et al., 2007                          |
| 15-hydroxydocosahexaenoic acid (15-HDHE)                                                            | oxylipin                   | Gaquereel et al., 2007                          |
| 11-hydroxyoctadecadienoic acid (11-HETE)                                                            | oxylipin                   | Gaquereel et al., 2007                          |
| Hydroxypheophytin a                                                                                 | tetrapyrrole               | Melo et al., 2015                               |
| Pheophytin d                                                                                        | tetrapyrrole               | Melo et al., 2015                               |
| Hydroxypheophytin d                                                                                 | tetrapyrrole               | Melo et al., 2015                               |
| Monogalactosyldiacylglycerol 2 (MGDG2)                                                              | galactolipid               | Pettitt et al., 1989                            |
| Digalactosyldiacylglycerols (DGDG)                                                                  | galactolipid               | Pettitt et al., 1989                            |
| Sulfoquinovosyldiacylglycerol 1 (SQDG1)                                                             | galactolipid               | Pettitt et al., 1989                            |
| Sulfoquinovosyldiacylglycerol 2 (QDG2)                                                              | galactolipid               | Pettitt et al., 1989                            |
| (2S)-1,2-bis-O-eicosapentaenoyl-3-O-β-D-galactopyranosylglycerol                                    | galactolipid               | Banskota et al., 2014                           |
| (2S)-1-O-eicosapentaenoyl-2-O-arachidonoyl-3-O-β-D-galactopyranosylglycerol                         | galactolipid               | Banskota et al., 2014                           |
| (2S)-1-O-(6Z,9Z,12Z,15Z-octadecatetraenoyl)-2-O-palmitoyl-3-O-β-D-galactopyranosylglycerol          | galactolipid               | Banskota et al., 2014                           |
| (2S)-1-O-eicosapentaenoyl-2-O-palmitoyl-3-O-β-D-galactopyranosylglycerol                            | galactolipid               | Banskota et al., 2014                           |
| (2S)-1,2-bis-O-arachidonoyl-3-O-β-D-galactopyranosylglycerol                                        | galactolipid               | Banskota et al., 2014                           |
| (2S)-1-O-arachidonoyl-2-O-palmitoyl-3-O-β-D-galactopyranosylglycerol                                | galactolipid               | Banskota et al., 2014                           |
| (2S)-1-O-eicosapentaenoyl-2-O-palmitoyl-3-O-(β-D-galactopyranosyl-6-1α-D-galactopyranosyl)-glycerol | galactolipid               | Banskota et al., 2014                           |
| (2S)-1-O-arachidonoyl-2-O-palmitoyl-3-O-(β-D-galactopyranosyl-6-1α-D-galactopyranosyl)-glycerol     | galactolipid               | Banskota et al., 2014                           |
| diphosphatidylglycerol, phosphatidic acid                                                           | phospholipid               | Pettitt et al., 1989                            |
| l-citrullinyl-l-arginine                                                                            | aminoacid                  | Laycock et al., 1977                            |
| Gigartinine                                                                                         | aminoacid                  | Laycock et al., 1977                            |
| Amide N                                                                                             | aminoacid                  | Young et al., 1958                              |
| Asterina-330*                                                                                       | Mycosporine-like aminoacid | Athukorala et al., 2016; Guihéneuf et al., 2018 |

Table S2 related to Fig 6. Orphan metabolites.

|                        |                               |                                                                       |
|------------------------|-------------------------------|-----------------------------------------------------------------------|
| MAA1*                  | Mycosporine-like aminoacid    | This study                                                            |
| MAA2*                  | Mycosporine-like aminoacid    | This study                                                            |
| Palythine*             | Mycosporine-like aminoacid    | Karsten et al., 1998; Athukorala et al., 2016; Guihéneuf et al., 2018 |
| Palythene              | Mycosporine-like aminoacid    | Karsten et al., 1998                                                  |
| Porphyra-334*          | Mycosporine-like aminoacid    | Athukorala et al., 2016                                               |
| Isofloridoside         | heteroside                    | Kremer et al., 1982                                                   |
| 1-Monohexadecanoin     | Long chain aliphatic alcohol  | Santos et al., 2015                                                   |
| Tetradecan-1-ol        | Long chain aliphatic alcohol  | Santos et al., 2015                                                   |
| Octadecan-1-ol         | Long chain aliphatic alcohol  | Santos et al., 2015                                                   |
| 1-penten-3-ol          | short chain aliphatic alcohol | Pina et al., 2014                                                     |
| 2(Z)-penten-1ol        | short chain aliphatic alcohol | Pina et al., 2014                                                     |
| 3-methylbutanoic acid  | carboxylic acid               | Pina et al., 2014                                                     |
| 2-methylbutanal        | aldehyde                      | Pina et al., 2014                                                     |
| 1-octen-3-ol           | short chain aliphatic alcohol | Pina et al., 2014                                                     |
| 2,6-dimethylpyrazine   | short chain ketone            | Pina et al., 2014                                                     |
| 2-propanone            | short chain ketone            | Pina et al., 2014                                                     |
| acetic acid, anhydride | carboxylic acid               | Pina et al., 2014                                                     |
| 2,2,3-trimethylpentane | alcane                        | Pina et al., 2014                                                     |
| tetradecane            | alcane                        | Pina et al., 2014                                                     |

\* incorporated in GSMN after Pathmodel

| <b>Analysed compounds</b> | <b>Molecular weight<br/>(g.mol<sup>-1</sup>)</b> | <b>RT<br/>(min)</b> | <b>m/z [M+H]<sup>+</sup><br/>(TMS)</b> |
|---------------------------|--------------------------------------------------|---------------------|----------------------------------------|
| brassicasterol            | 398.64                                           | 25.5                | 470                                    |
| campesterol               | 400.68                                           | 26.6                | 472                                    |
| 5 $\alpha$ -cholestane    | 372.67                                           | 20.3                | 372                                    |
| cholesterol               | 386.65                                           | 24.7                | 458                                    |
| cycloartanol              | 428.75                                           | 30.5                | 500                                    |
| cycloartenol              | 426.72                                           | 29.0                | 498                                    |
| cycloeucalenol            | 426.73                                           | 30.4                | 498                                    |
| 7-dehydrocholesterol      | 384.63                                           | 25.6                | 456                                    |
| desmosterol               | 384.64                                           | 25.5                | 456                                    |
| ergosterol                | 396.65                                           | 26.2                | 468                                    |
| fucosterol                | 412.69                                           | 28.2                | 484                                    |
| lanosterol                | 426.39                                           | 27.8                | 498                                    |
| lathosterol               | 386.65                                           | 25.8                | 458                                    |
| $\beta$ -sitosterol       | 414.39                                           | 28.0                | 486                                    |
| squalene                  | 410.72                                           | 19.8                | 482                                    |
| stigmasterol              | 412.66                                           | 27.0                | 484                                    |
| zymosterol                | 384.64                                           | 25.9                | 456                                    |

**Table S3, related to Figure 5. Retention times and m/z ratio for analytical standards of sterols on a 7890-5975C Agilent GC-MS.**

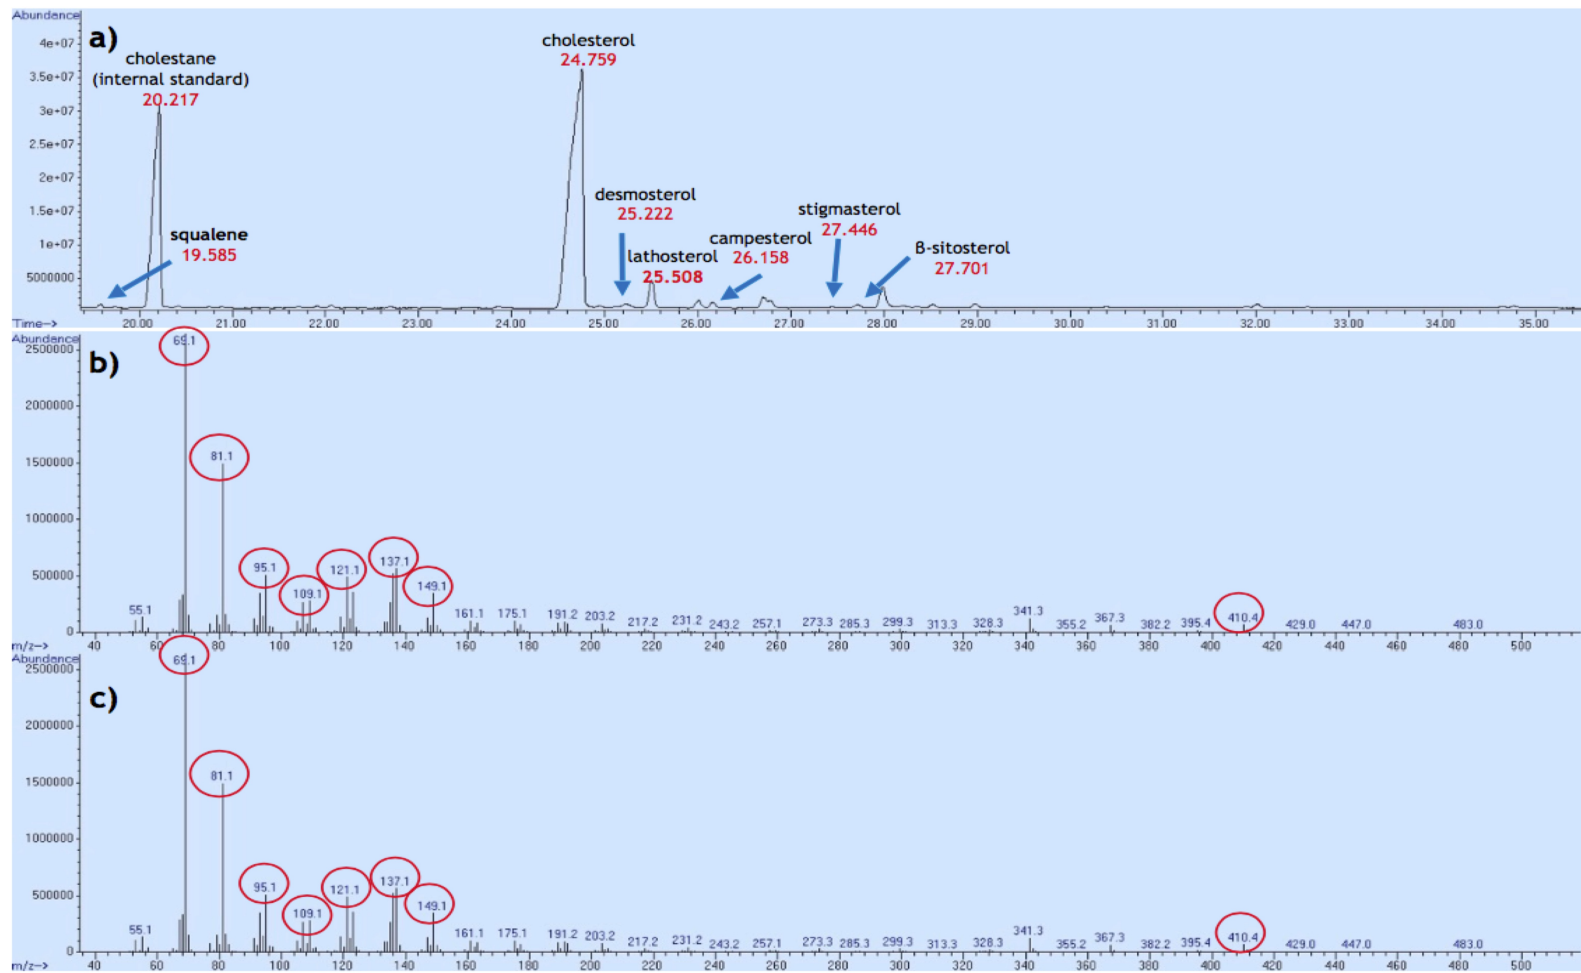

**Figure S1, related to Figure 5. Identification of squalene in *C. crispus*.** a) Total Ion Chromatogram (TIC) from *C. crispus* extract. b) MS spectrum of squalene in *C. crispus* extract. c) MS spectrum of the squalene analytical standard. Main fragmentation peaks identical in both spectra are highlighted in red circles.

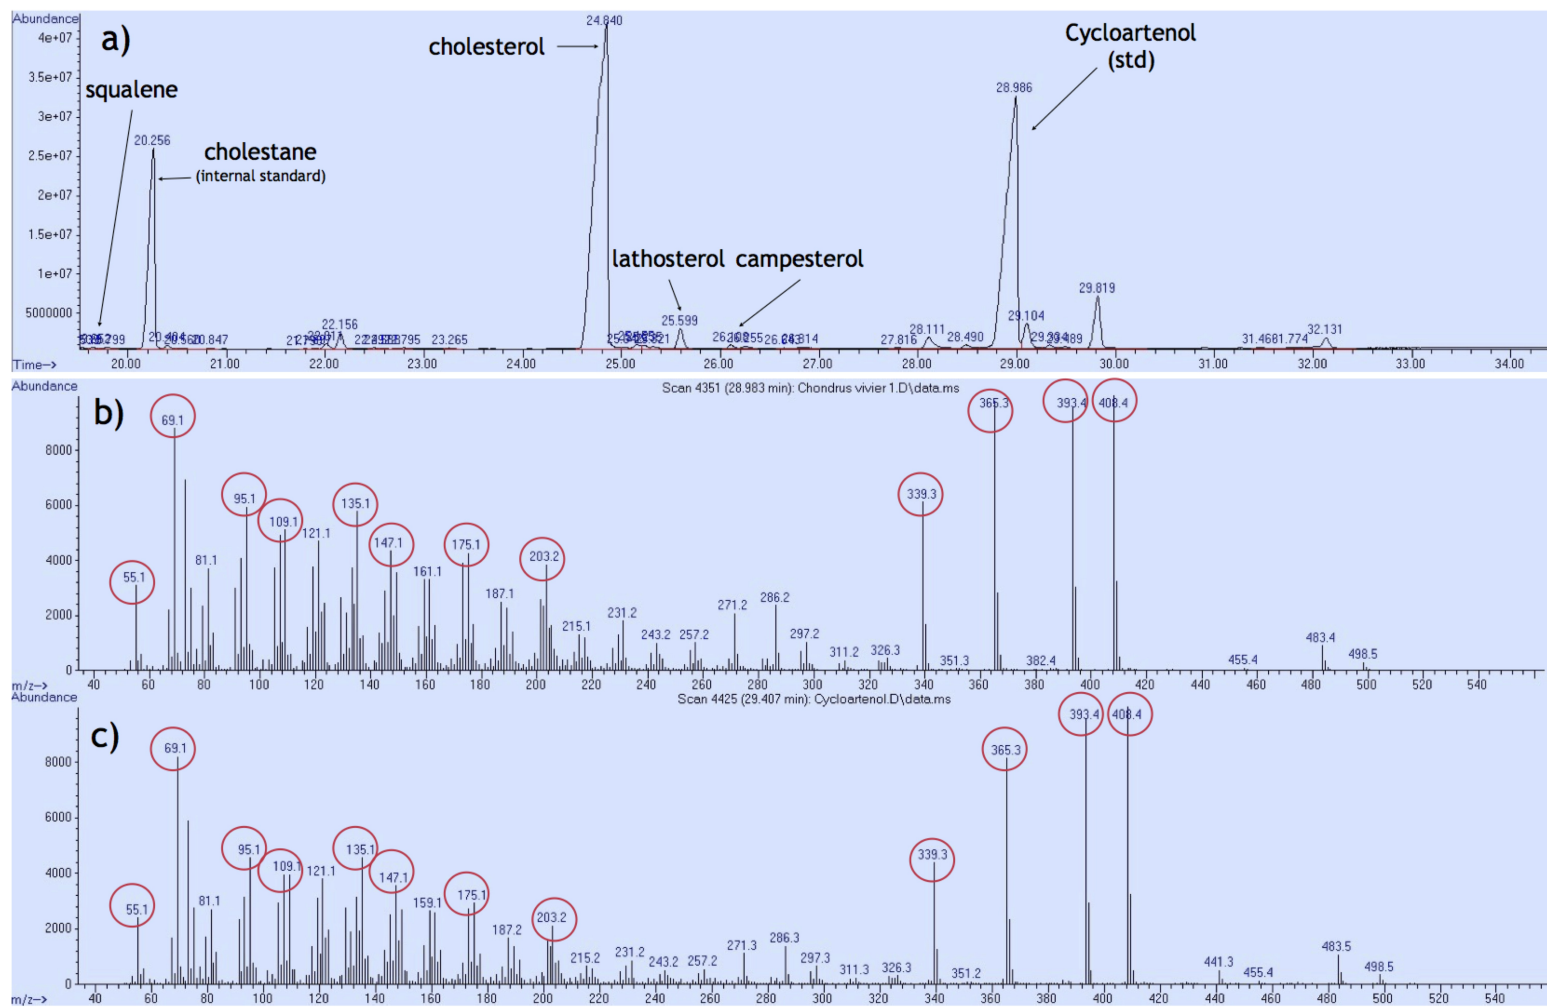

**Figure S2, related to Figure 5. Control for technical detectability of cycloartenol in spiked *Chondrus crispus* extract.**

a) TIC from *Chondrus crispus* extract incubated with cycloartenol. b) MS spectrum of cycloartenol standard incorporated in *C. crispus* extract. c) MS spectrum of cycloartenol standard alone. Main fragmentation peaks identical in both spectra are highlighted in red circles.



| MAAs                            | Palythine | Mycosporine-glycine | MAA1     | Isujirene/Palythene | Asterina-330 | Palythinol<br>or MAA2 | Shinorine | Porphyra-334 |
|---------------------------------|-----------|---------------------|----------|---------------------|--------------|-----------------------|-----------|--------------|
| Rt (min.)                       | 8.3       | 20.0                | 10.8     | 19.3                | 8.7          | 10.1                  | 18.5      | 19.5         |
| m/z [M+H] <sup>+</sup> observed | 245.1090  | 246.0932            | 271.1241 | 285.1401            | 289.1349     | 303.1497              | 333.1245  | 347.1399     |
| m/z calculated                  | 245.1132  | 246.0972            | 271.1288 | 285.1445            | 289.1394     | 303.1551              | 333.1292  | 347.1449     |
| EIC (Intens. x108)              |           |                     |          |                     |              |                       |           |              |
| <i>C. crispus</i> (April)       | 16118542  | 707375              | 3254803  | 209911              | 5116637      | 26945                 | 3129533   | 353130       |
| <i>C. crispus</i> (July)        | 12600749  | 85700               | 928894   | 36714               | 3788544      | 18560                 | 394887    | 11021        |
| <i>C. crispus</i> (August)      | 16469850  | 219296              | 857212   | 238033              | 5653618      | 32998                 | 1063642   | 83569        |
| <i>C. crispus</i> (Sept.)       | 11230824  | 56477               | 2546286  | 77636               | 2917730      | < LOD                 | 5199737   | 33580        |
| UV (mAU)                        |           |                     |          |                     |              |                       |           |              |
| <i>C. crispus</i> (April)       | 20420     | 31,525              | 1541     | < LOD               | 6996         | < LOD                 | 2299      | 117          |
| <i>C. crispus</i> (July)        | 14578     | 171,83              | 1487     | < LOD               | 7106         | 327,43                | 335       | < LOD        |
| <i>C. crispus</i> (August)      | 19005     | 242,7               | 2143     | < LOD               | 9927         | 707,57                | 1245      | 248          |
| <i>C. crispus</i> (Sept.)       | 12768     | < LOD               | 989      | < LOD               | 6367         | < LOD                 | 5128      | 136          |

**Table S4, related to Figures 2 and 4. MAAs composition in *Chondrus crispus* determined by LC-UV-HRMS. Extracted Ion Chromatogram (EIC) of selected MAAs were obtained in positive mode; UV Absorbance was recorded at 330 nm (LOD = Limit Of Detection).**

| Name of source reaction          | Metacyc ID                    | Molecular transformation        | Biosynthesis pathway |
|----------------------------------|-------------------------------|---------------------------------|----------------------|
| rxn_4282                         | RXN-4282                      | delta24_25_reduction            | Sterols              |
| c24_c29_demethylation            | RXN-20433, RXN20434, RXN20435 | c24_c29_demethylation           | Sterols              |
| rxn_20436                        | RXN-20436                     | cyclopropylsterol isomerisation | Sterols              |
| rxn_20438                        | RXN-20438                     | c14_demethylation               | Sterols              |
| rxn_20439                        | RXN-20439                     | c14_reduction                   | Sterols              |
| rxn_4286                         | RXN-4286                      | c8_isomerisation                | Sterols              |
| c24_c28_demethylation            | RXN-20440, RXN20441, RXN20442 | c24_c28_demethylation           | Sterols              |
| rxn_1_14_21_6                    | 1.14.21.6-RXN                 | c5_desaturation                 | Sterols              |
| rxn66_323                        | RXN66-323                     | delta7reduction                 | Sterols              |
| rxn66_28                         | RXN66-28                      | delta24_25_reduction            | Sterols              |
| rxn_4021                         | RXN-4021                      | c24_methylation                 | Sterols              |
| rxn_2_1_1_143                    | 2.1.1.143-RXN                 | c24'_methyltransfer             | Sterols              |
| rxn_20131                        | RXN-20131                     | delta24_24'_reduction           | Sterols              |
| rxn_4243                         | RXN-4243                      | c22_desaturation                | Sterols              |
| c22_desaturation                 | RXN-4242 or RXN-8352          | c22_desaturation                | Sterols              |
| mysa                             | RXN-17372                     | cyclisation                     | MAA                  |
| rxn_17366                        | RXN-17366                     | methyl_transfer                 | MAA                  |
| rxn_17370                        | RXN-17370                     | non-enzymatic tautomerization   | MAA                  |
| rxn_17896                        | RXN-17896                     | methyl_transfer                 | MAA                  |
| aminoacid_C_1_transfer           | RXN-17368                     | aminoacid_c1_transfer           | MAA                  |
| aminoacid_C_3_transfer_serine    | RXN-17367                     | aminoacid_c3_transfer           | MAA                  |
| aminoacid_C_3_transfer_threonine | -                             | aminoacid_c3_transfer           | MAA                  |
| hydrogenation                    | -                             | hydrogenation                   | MAA                  |
| demethylation                    | -                             | demethylation                   | MAA                  |
| dehydration                      | -                             | dehydration                     | MAA                  |
| decarboxylation_1                | -                             | decarboxylation                 | MAA                  |
| decarboxylation_2                | -                             | decarboxylation                 | MAA                  |
| hydrolysis                       | -                             | hydrolysis                      | MAA                  |

**Table S5, related to Figure 3. List of molecular transformations inferred in Pathmodel and associated source reactions.**

| Steps                           | Yeast | Human   | <i>Arabidopsis</i> | <i>C. crispus</i>                  |
|---------------------------------|-------|---------|--------------------|------------------------------------|
| squalene monooxygenation        | ERG1  | SQLE    | SQE1-7             | scaffolds 90*, 20*, 57*            |
| oxydosqualene cyclisation       | ERG7  | LSS     | CAS                | CHC_T00008265001                   |
| C-14 demethylation              | ERG11 | CYP51A1 | CYP51G1            | CYP51G1 (CHC_T00009303001)         |
| C-14 reduction                  | ERG24 | TM7SF2  | FK                 | CHC_T00003466001                   |
| C-4 demethylation               | ERG25 | SC4MOL  | SMO1, SMO2         | CHC_T00010320001, scaffold212*     |
| delta-8, delta-7 isomerisation  | ERG2  | EBP     | HYD1               | CHC_T00001257001                   |
| C-5 desaturation                | ERG3  | SC5DL   | STE1               | CHC_T00006481001                   |
| C24 or C24' methylation         | ERG6  | -       | SMT1, SMT2         | CHC_T00009101001, CHC_T00000837001 |
| delta-7 reduction               | -     | DHCR7   | DWF5               | CHC_T00006492-3001*                |
| delta-24 reduction              | ERG4  | DHCR24  | DWF1/SSR           | CHC_T00002789001                   |
| C-22 desaturation               | ERG5  | -       | CYP710             | CYP805A1-C1 or CYP808A1-H1         |
| cyclopropylsterol isomerisation | -     | -       | CPI1               | CHC_T00002985001                   |

**Table S6, related to Figure 5. Comparative Genomic Analysis of Sterol Synthesis Enzymes.** Dark blue indicates orthologous sequences, light blue indicates paralogous ones, and green indicates yeast enzymes non orthologous to animal or plant sequences but known to perform the same enzymatic reaction. Five corrected sequences and new predictions are indicated with an asterisk (\*) and provided in Dataset S1.

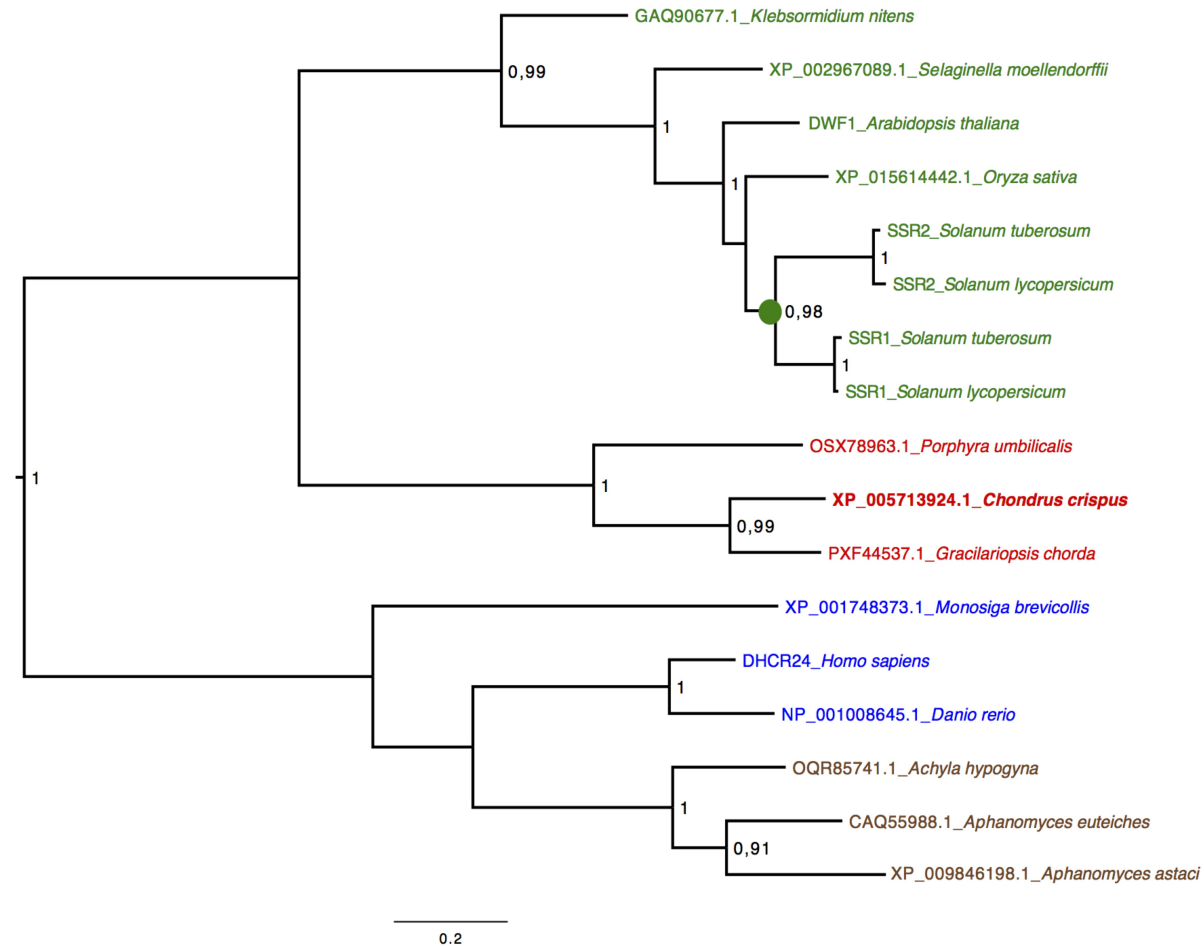

**Figure S3, related to Figure 5. Maximum-likelihood tree of eukaryotic side-chain reductases.** In green: protein sequences from green plants (streptophytes). The green dot indicates lineage-specific duplication in solanaceans. In red: protein sequences from red algae. In blue: protein sequences from opisthokonts (vertebrates + choanoflagellates). In brown: sequences from oomycete stramenopiles. Likelihood-ratio test values above 0.90 are indicated. Those above 0.97 are considered significant.

**Dataset S1, related to Figure 5.** New or edited protein sequences associated to the sterol synthesis pathway in *Chondrus crispus*.

```
>scaffold90:7511-6165(-) putative squalene epoxidase
RDGRRVLCVERQLYAPSGALCAPPRIVGELLQPGGYDALCRLGLADALLDIDAQVIRGYA
LFLGPRAERLPYHQPGGPDPAARQPEGRAFHNGRFLKRLREIARAHPNV
TLVEGNVLALLERDGAVVGVRYATRGNKAATAHAGLTIAC
DGCGSALRKRAAAHHHVTVYSNFHGLVHLVHPALPFPNHGHVVLADPCPVLFYPISATEVR
CLVDIPSTYAGDAAEYILHTVVPQVPPPLRAPLATAVRERRSKMMPNRVMPAPA
HVVPGAVLLGD AFNMRHPLTGGGMTVALTDVELLRELLAPVPDLSDAPAVAAKLQLFYER
RKPMSTTINILANALYTLFCATDDPALRDMRAACLDYLAKGGRMTHDPIAMLGGLKPQRH
LLLAHFFAVALYGCGKALMPFPTPARLVRAWSIFRASFNIIKPLANAEGFWPLSWLPLNSL
```

```
>scaffold20:461442-460650(-) putative squalene epoxidase
LCRLGLADALLHIDAQVIRGYALFLGPRAERLPYHQPEPDPDPAARQPEG
RAFHNGRFLKRLREIARAHPNVTLIEGNVLALLERDGAVV
GVRYATRGNKAATAHAGLTIACDGCGSALRKRAAAHHHVTVYSNFHGLVHLVHPALPFPNH
GHVVLAHPCPVLFYPISATEVRCLVDL
YILHTVVPQVPPSLRAPLATTVRERRSKMMPNRVMPAPAHVVPGAVLLGD AFNMRHPLTG
GGMTVALTDVELLRGLLAP
```

>scaffold57:152407-364140(+) putative squalene epoxidase  
RFAGPEHPSCGLKPQRHLLLAHFFAVALYGCGKALMPFPTPARPVRAWSIFRASFNFIK  
PLANAEGFWPLSWLPLN  
LCRLGLADALLDIDAQVIRGYALFLGPRAERLPY  
LCRLGLADALLHIDAQVIRGYALFLGPRAERLPYHQPGGPDPAARPQPEG  
RAFHNCRFLKRLREIARAHPNVTLIEGNVLALLERDGA  
GVRYATRGNKAAATAHAGLTIACDGC  
SALRKRAAAHHHVTVYSNFHGLV  
LHVPALPPFNH  
GHVVLAHPCPVLFYPISATEVRCLVDL  
WSTYAGDAAEYILHTVVPQVPPSLRAPLATAV  
RERRSKMMPNRVMPAPAHVVP  
GAVLLGD  
AFNMRHPLTGGGMTVALTDVELLRGLLAP

>scaffold212:177405-176674(-) putative C-4 sterol methyl oxidase  
WDLPCRHTRAYPMFVVGCFASQLAGYFLGCAPFVLLDALRARSTPFRKIQPGKYAPRRAV  
FAAAAAMLRSFATVVLPPLAAGGLFIERVGISRDAPFSPRVLLQVAYFFLVEDFLNYW  
VHRALHLPWLYTRVHSVHHEYDAPFAVVAAYAH  
PVEVVLQALPTFAGPLMLGPHLYTLCV  
WQLFRNWEAIDIHSGYDHAWGLASVLPWYAGPEH  
HDFHHFLHSGNFASVFTWCDWAYGTD  
LAYE

>CHC\_T00006492-3001 fusion of adjacent protein predictions CHC\_T00006492001 and CHC\_T00006493001;  
putative sterol delta-7 reductase  
MLGIAAWKGFIRYGLLYDHFGEVLAFLGKFALVVTVLLYFRGIYFPTNSDSGTTTSFGIVWDMWHGTELHP  
EIFGVSLKQLVNCRFALMGWSVAIVAFACKQREQYGYVSNM  
LVSVVLQLVYIFKFFVWEAGYFNSVSLD  
HSHVCLFWIYLRPLY  
MVGVGAICCNYWTDKQREVFRATNGQVTIWGQKPV  
SIEAQYVTGDGKKRRSLLASGWWGVS  
SRHVNYVFE  
IALTFCWSVPAGGTGVIPIVYVMFLTILLTD  
RAYRDEVRCSEKYGKYEEYCRLV  
PYKMI PGVY

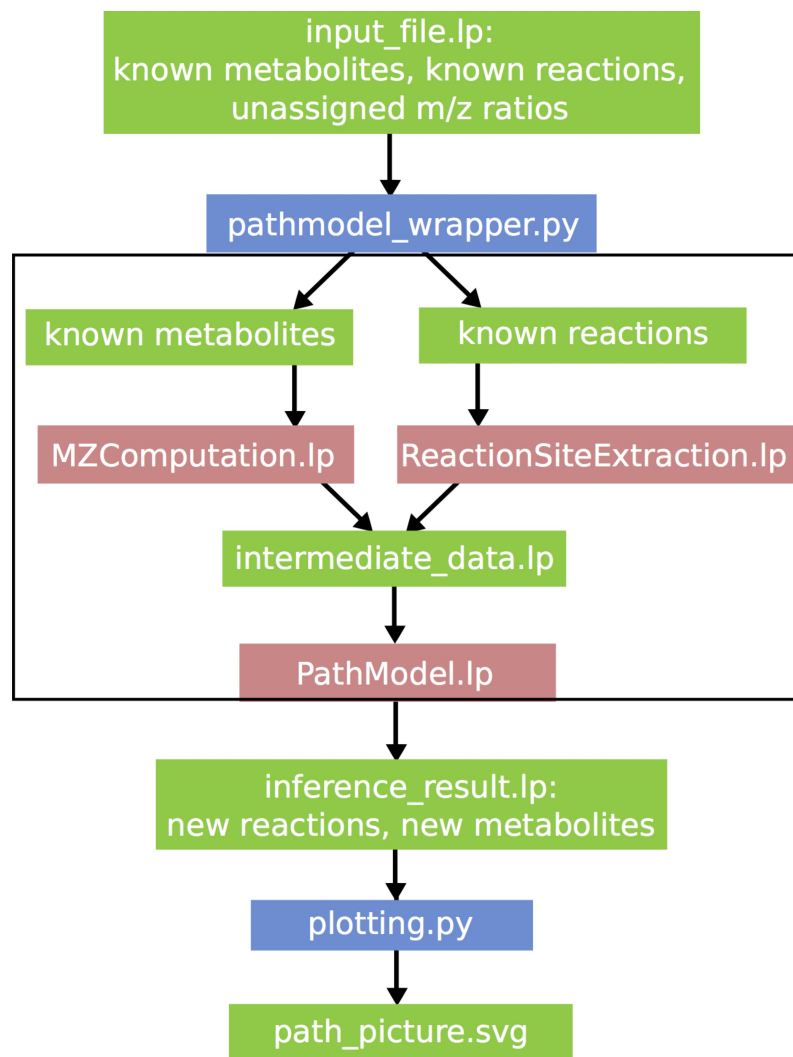

**Figure S4, related to Figure 3. Architecture of Pathmodel scripts.** In green: Data files, either input or result files. In red: ASP scripts. In blue: Python scripts. The black line shows the wrapping of all the scripts inside by pathmodel\_wrapping.py.

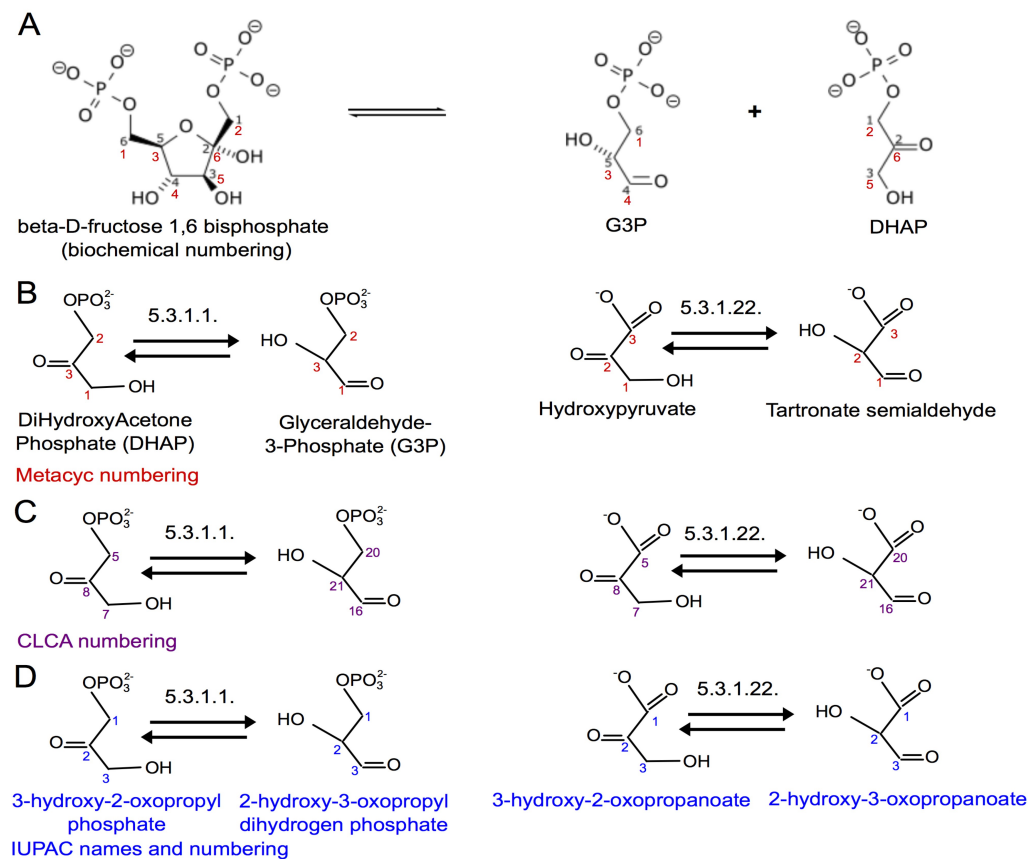

**Figure S5, related to Figure 3. Comparisons of atom mapping using MetaCyc, CLCA and IUPAC.** A. Biochemical origin of G3P and DHAP generates numbering inconsistencies that have to be solved by carbon atom renaming. B. Metacyc numbering does not label identically atoms from two reactions involving the same molecular transformation. C. CLCA numbering allows comparisons of reactions but not simultaneous atom mapping. D. IUPAC numbering allows both simultaneous atom mapping and comparisons of reactions.
